# Supplementary material
Source: MDPI journal article supplement (https://www.mdpi.com/2072-4292/14/1/220)
Supplement: s1 [file s1]

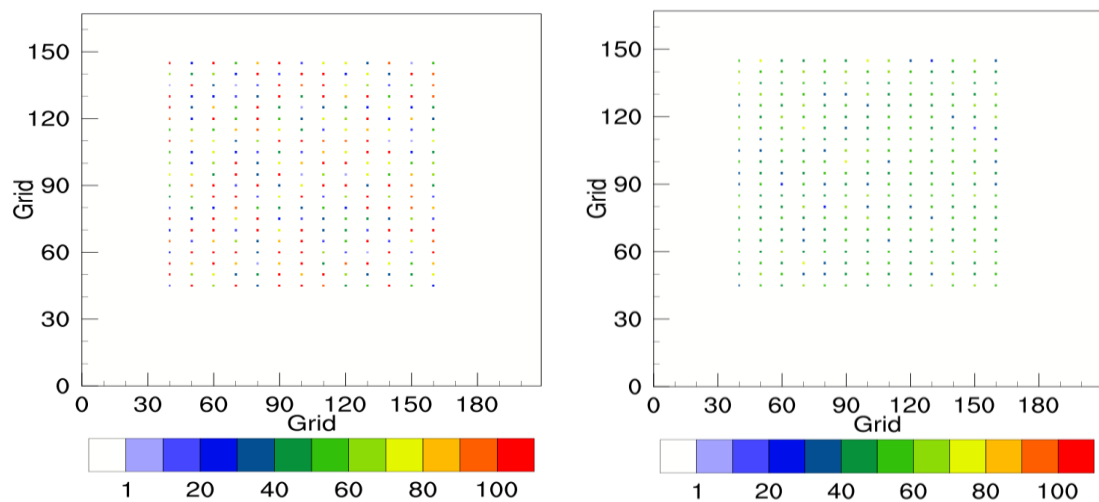

**Figure S1** (a) The "real" emissions (EM\_obs) and (b) the background emission EM\_50. Units are  $\text{mol km}^{-2} \text{hr}^{-1}$ .

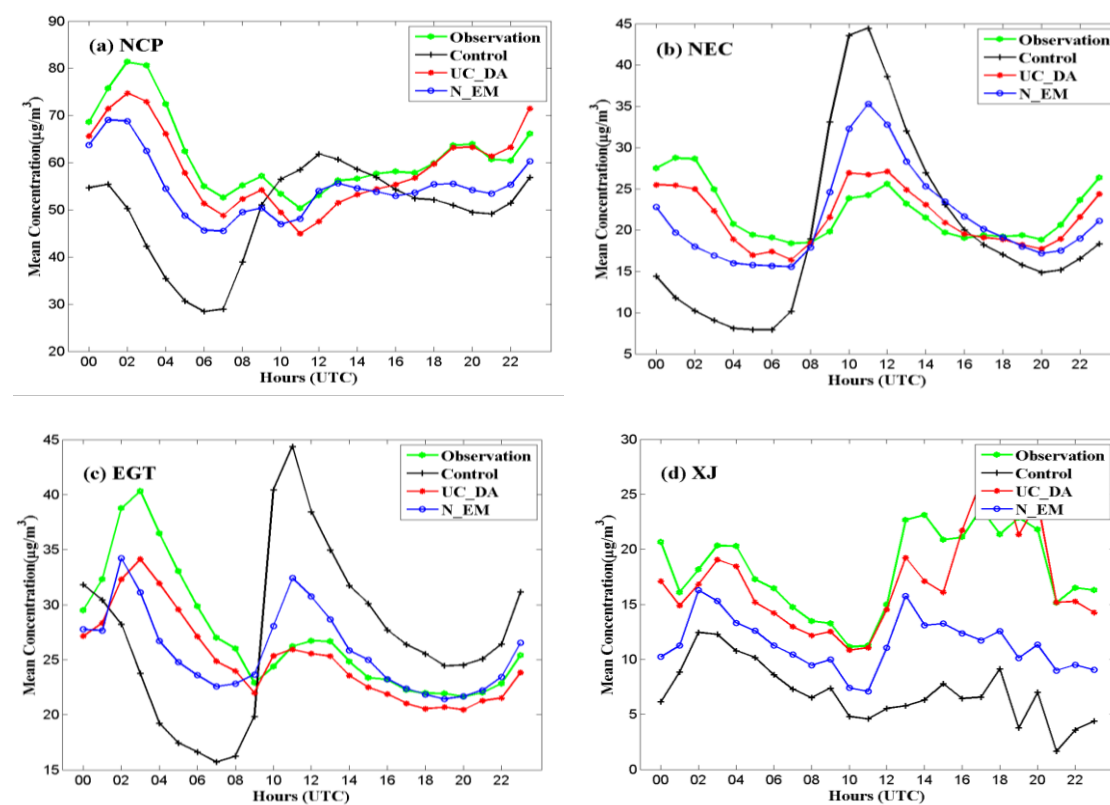

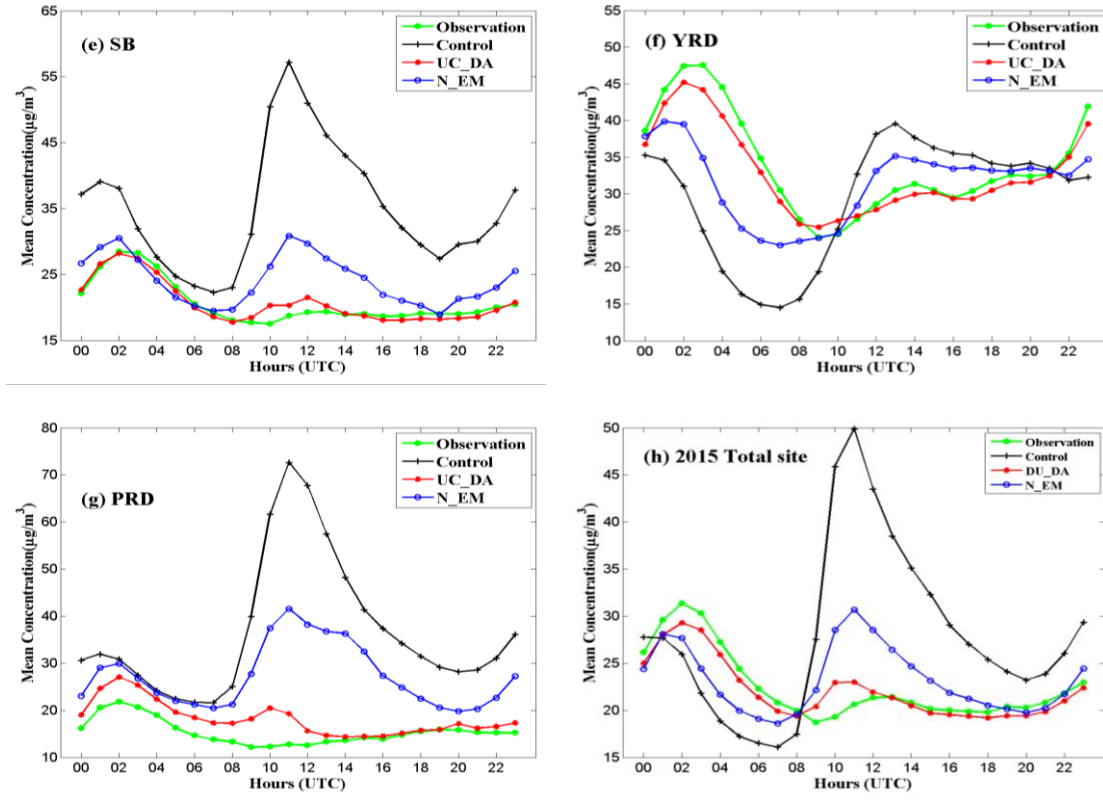

**Figure S2.** Diurnal pattern of selected sites (in condition of static wind) averaged  $\text{SO}_2$  concentration in October 2015: (a) NCP, (b) NEC, (c) EGT, (d) XJ, (e) SB, (f) YRD, (g) PRD, (h) China. Units:  $\mu\text{g m}^{-3}$ . UC\_DA: Updata Cycle Data Assimilation; N\_EM: New Emission.

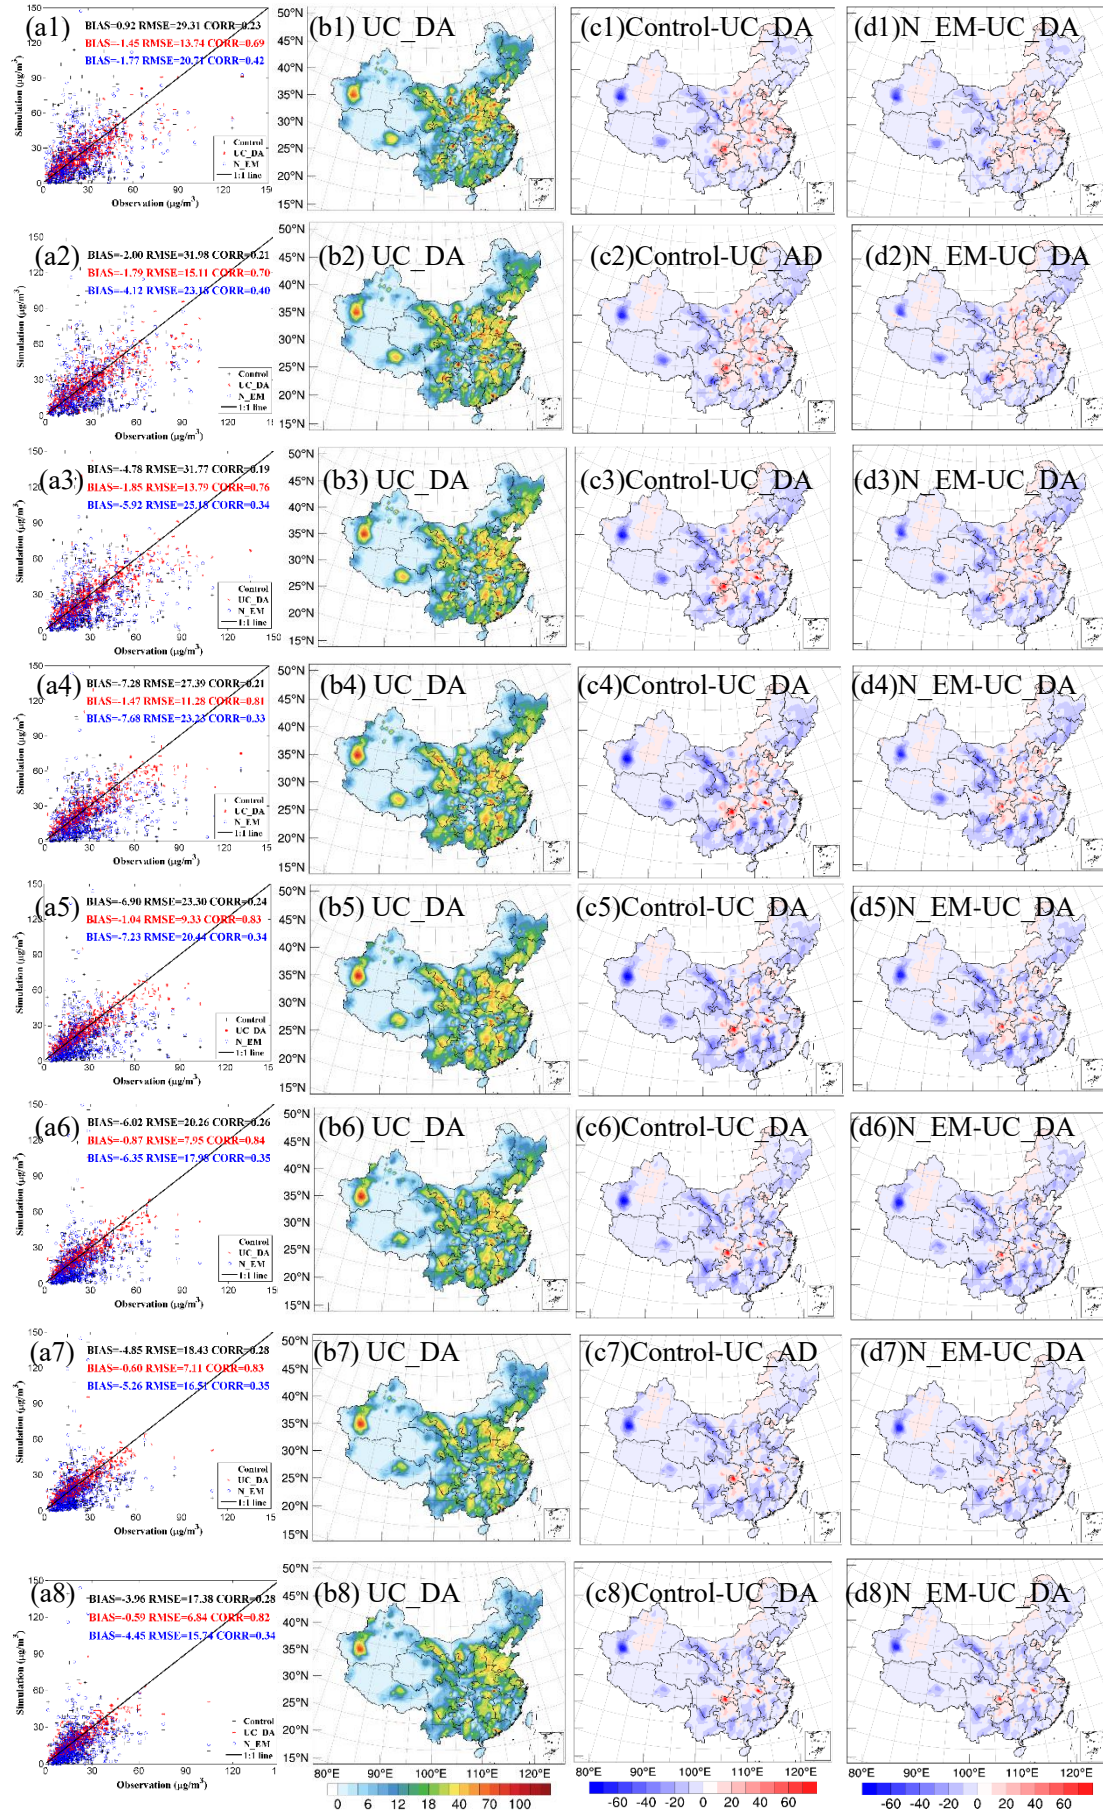



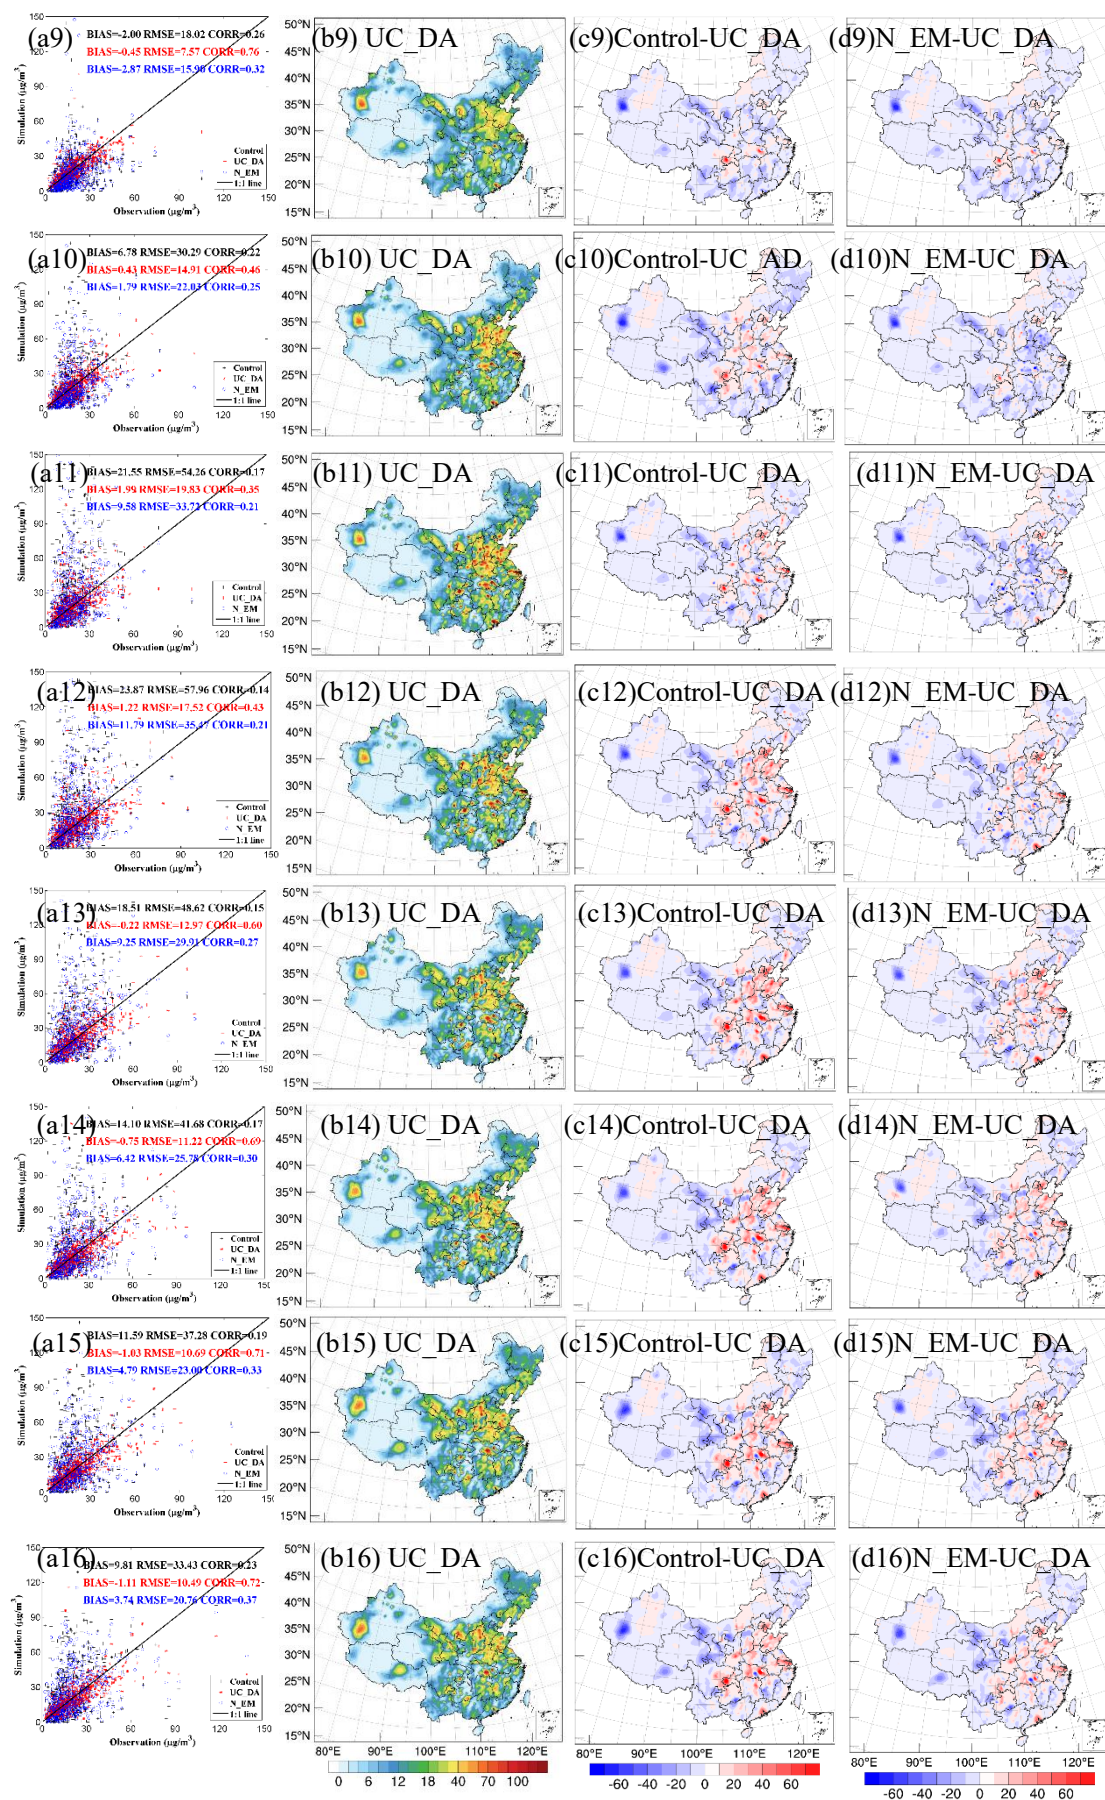



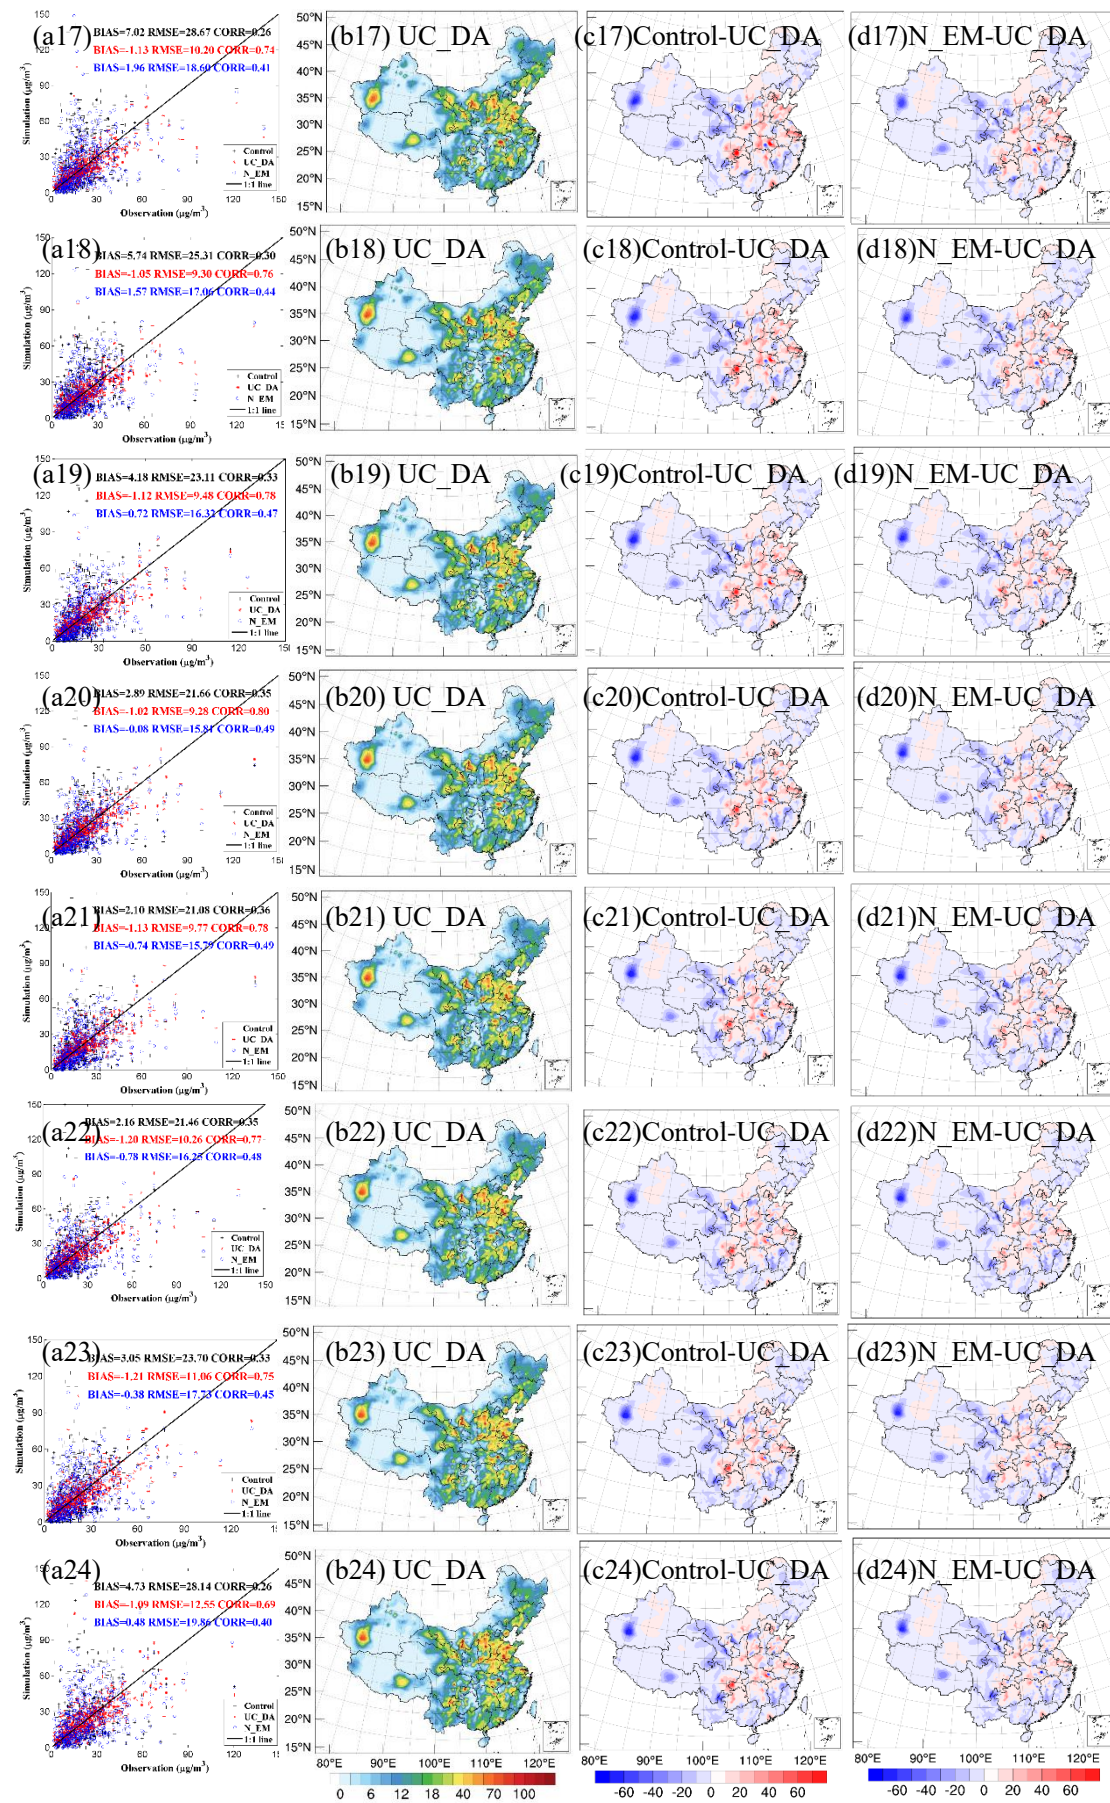

**Figure S3.** Model simulated and observed SO<sub>2</sub> concentrations for October 2015 in China from 00UTC to 23UTC (top-down). a: Scatter plots, b: the hourly average simulated by UC\_DA experiment, c: differences of the hourly average between Control experiment and UC\_DA experiment, and d: differences of the hourly average between N\_EM experiment and UC\_DA experiment. Units:  $\mu\text{g m}^{-3}$ . UC\_DA: Udata Cycle Data Assimilation; N\_EM: New Emission.

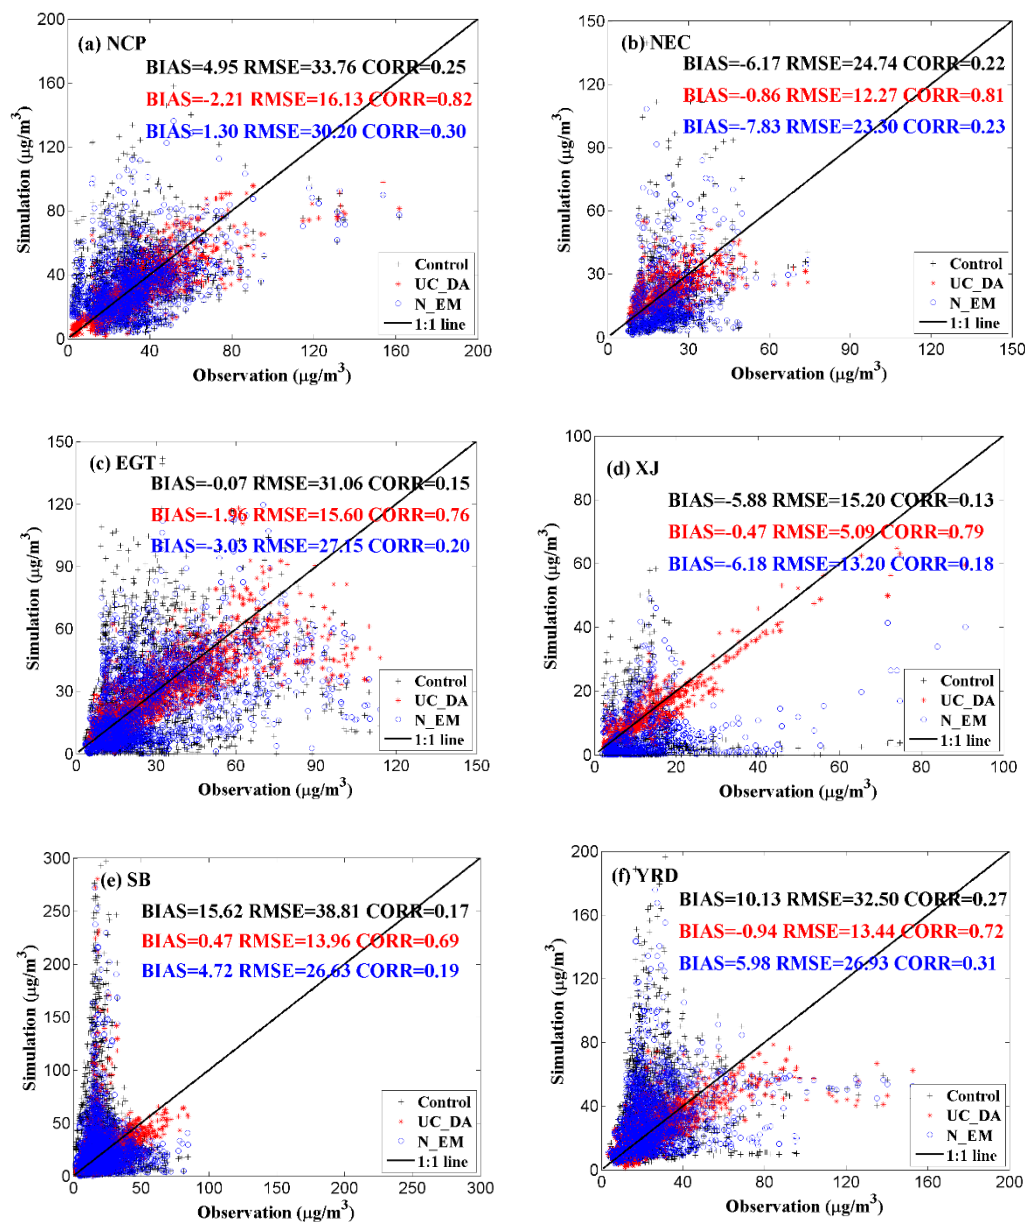

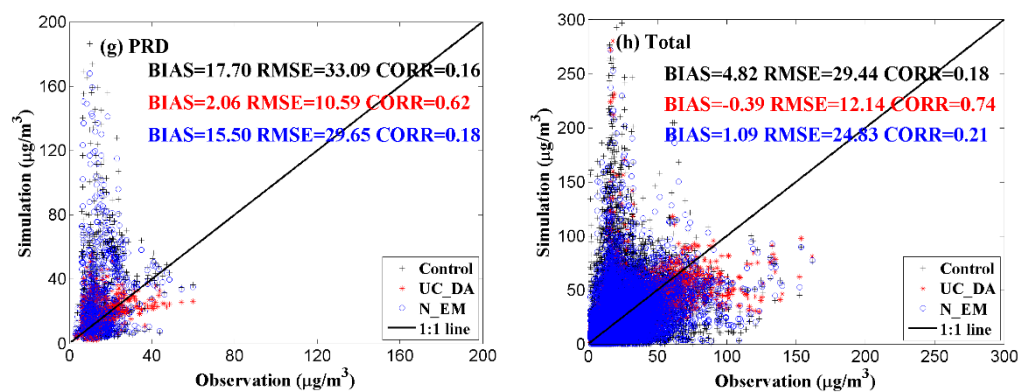

**Figure S4.** Scatter point between observation and model simulations for October 2015: **(a)** NCP, **(b)** NEC, **(c)** EGT, **(d)** XJ, **(e)** SB, **(f)** YRD, **(g)** PRD, **(h)** China. Units:  $\mu\text{g m}^{-3}$ . UC\_DA: Updata Cycle Data Assimilation; N\_EM: New Emission.
